1 **Microbial community assembly and metabolite profile of the gut microbiome in extremely low**  
2 **birthweight infants**

3 Stephen Wandro<sup>1\*</sup>, Stephanie Osborne<sup>2</sup>, Claudia Enriquez<sup>2</sup>, Claudia Bixby<sup>2</sup>, Antonio Arrieta<sup>2</sup>, Katrine  
4 Whiteson<sup>1\*</sup>

5

6 <sup>1</sup>Molecular Biology and Biochemistry, University of California Irvine

7 <sup>2</sup>Children's Hospital of Orange County

8 \* Corresponding authors. Emails: [swandro@uci.edu](mailto:swandro@uci.edu) and [katrine@uci.edu](mailto:katrine@uci.edu)

9

10 **Key-words:** Preterm infant, intestinal microbiome, metabolome

11

12 **Abstract**

13 Background: The assembly of the intestinal microbiota of extremely low birthweight (ELBW) infants has  
14 an important impact on both immediate and long term health. ELBW infants are frequently given  
15 antibiotics which are likely to perturb the assembly of the microbiota. Health complications are not  
16 uncommon for ELBW infants; they face health crises including sepsis and necrotizing enterocolitis (NEC).  
17 Microbes are thought to be involved in the pathogenesis of NEC, but the mechanisms are unclear. New  
18 understanding of the importance of human milk oligosaccharides and the establishment of a  
19 *Bifidobacteria*-dominated gut microbiota early in infancy suggest that all preterm infants have abnormal  
20 microbial colonization. The initial assembly of intestinal microbial communities may have significant  
21 impact on immune development and lifelong health.

22 Results: We measured the bacterial composition and metabolite profile of 32 ELBW infants by 16S rRNA  
23 gene sequencing and untargeted gas chromatography mass spectrometry of fecal samples. Infants  
24 either remained healthy, developed late-onset sepsis, or developed necrotizing enterocolitis. The

25 bacterial compositions were similar to what has been observed in other studies of preterm infants. Fecal  
26 samples are dominated by aero-tolerant bacterial species, specifically *Enterococcus*, *Enterobacteriaceae*,  
27 and *Staphylococcus*. Only three ELBW infants were colonized by *Bifidobacteria*. Fecal samples from  
28 infants who developed NEC were not distinguishable from other infant samples based on bacterial  
29 compositions (Permanova  $R^2 < 0.001$ ,  $p = 0.99$ ) or metabolite profiles (Permanova  $R^2 = 0.05$ ,  $p = 0.24$ ).  
30 Instead the bacterial composition ( $R^2 = 0.63$ ,  $p < 0.001$ ) and metabolite profile ( $R^2 = 0.43$ ,  $p < 0.001$ ) were  
31 highly personalized for each infant. There were not significant correlations between the bacterial  
32 composition and metabolite profiles of fecal samples (Mantel test  $r = 0.18$ ,  $p < 0.001$ ).

33 Conclusions: Although antibiotics likely contribute to the instability of the ELBW infant intestinal  
34 microbiota, personalized signatures of bacteria and metabolites are still clearly present. Neither the  
35 bacterial composition or metabolite profile was unique in cases of disease. While bacteria certainly  
36 contribute to the profile of metabolites present in feces, in these ELBW infants, significant correlations  
37 between bacterial relative abundances as determined by 16S rRNA gene sequencing and untargeted GC-  
38 MS metabolite profiles were not detectable.

39

## 40 **Background**

41 The intestinal microbiota of infants initially assembles by exposure to the mother's microbiota as well as  
42 exposure to microbes in the environment [1]. In the first few days, the intestines are colonized by  
43 facultative anaerobes, which consume the oxygen in the intestines, creating an anaerobic environment  
44 that results in the growth of anaerobic *Bifidobacteria*, *Bacteroides*, *Lactobacillus* and *Clostridium* [2].  
45 When infants are born preterm, they are exposed to environmental and human associated microbes  
46 earlier than normal. Moreover, preterm infants are almost uniformly treated with antibiotics, further

47 altering microbial exposure during a critical developmental window, with long-term metabolic  
48 consequences even after the microbial community recovers from antibiotic treatment [3, 4].

49 While antibiotics have tremendously reduced infant mortality, their effect on microbiota assembly and  
50 resulting health consequences is not fully understood. Prenatal and postnatal antibiotics have been  
51 shown to reduce the diversity of the infant intestinal microbiota [5, 6]. Children under two years old are  
52 prescribed antibiotics at a higher rate than any other age group, and 85% of ELBW infants are given at  
53 least one course of antibiotics [7]. Even if an infant is not exposed to antibiotics after birth,  
54 approximately 37% of pregnant women use antibiotics over the course of the pregnancy [8].

55 In healthy infants, breastfeeding is thought to select for strains of *Bifidobacteria* capable of digesting  
56 human milk oligosaccharides [9, 10]. Throughout human history, healthy breastfed infant guts have  
57 been dominated by *Bifidobacteria*, but modern sanitation and frequent use of antibiotics has led to  
58 decreased colonization of infants with *Bifidobacteria* [10, 11]. Several studies profiling the intestinal  
59 microbiota of preterm infants have shown *Bifidobacteria* to be largely absent [12, 13]. The lack of  
60 *Bifidobacteria* in addition to frequent use of antibiotics on preterm infants may affect the microbiota in  
61 a way that has both immediate and long-lasting health consequences.

62 In the short term, infants can be infected by pathogenic bacteria that results in sepsis, which is  
63 categorized as early-onset or late-onset depending on the timing after birth. Preterm infants are also at  
64 high risk to develop necrotizing enterocolitis (NEC), which is a devastating disease that causes portions  
65 of the bowel to undergo necrosis. NEC is one of the leading causes of mortality in preterm infants, who  
66 make up 90% of NEC cases. The incidence of NEC among ELBW preterm infants is approximately 7% and  
67 causes death in about one third of cases [14]. NEC is thought to be caused by an excessive inflammatory  
68 response to intestinal bacteria [15].

69 Many of the long-term consequences of microbial colonization are believed to be mediated by  
70 interactions between the intestinal microbiota and the immune system. The immune system extensively  
71 interacts with the intestinal microbiota by continuous sampling through the intestinal epithelium [16].  
72 Evidence is building for associations between the microbiome and rising rates of obesity and type 2  
73 diabetes [17-19]. Interactions between bacteria and the immune system are thought to contribute to  
74 autoimmune disorders including allergies, multiple sclerosis, irritable bowel syndrome, and Crohn's  
75 disease [20, 21]. Healthy microbial exposures could be important for reducing the incidence of these  
76 diseases, starting with a *Bifidobacterium longum* dominated gut in early infancy.

77 In addition to direct interactions, the microbiota interacts with the immune system through the  
78 production of metabolites that can be taken up directly by immune and epithelial cells. For example,  
79 bacterial production of short chain fatty acids can affect health and integrity of the intestinal epithelia  
80 and immune cells [22-25]. However, few studies use metabolites alongside bacterial community  
81 profiling.

82 In this retrospective study, we follow the changes in the gut microbiota over time in 32 ELBW infants  
83 born at Children's Hospital Orange County. We aim to simultaneously track the bacterial composition  
84 and metabolite profile to identify differences between healthy and sick infants. Almost all infants in the  
85 study received antibiotics. Infants were classified into three groups based on health outcomes: healthy  
86 controls, late-onset sepsis, and NEC. The composition of the intestinal microbiota was measured by 16S  
87 rRNA gene sequencing of fecal samples taken over time. Infant fecal communities were dominated by  
88 *Enterobacteriaceae* and *Enterococcus*, while *Bifidobacteria* was almost completely absent. Untargeted  
89 metabolomics analysis of the fecal samples by gas chromatography mass spectrometry (GC-MS) was  
90 used to measure metabolite abundances to further characterize the activity of the intestinal microbiota.  
91 We found both the bacterial composition and metabolomics profile of each infant to be highly  
92 personalized rather than indicative of disease.

93

94 **Methods**

95 *Sample Collection:* Stool samples from preterm infants were collected by nurses at Children's Hospital  
96 Orange County (CHOC) for three years from 2011 to 2014 with approval from the CHOC Institutional  
97 Review Board (#100771). Samples were immediately stored at -20 °C then transferred to -80 °C no more  
98 than three days post-collection. Samples were kept at -80 °C and thawed once for DNA extraction and  
99 metabolomics. A total of 77 stool samples were collected from 32 preterm infants. Twenty-one infants  
100 remained healthy, three developed NEC, and nine developed late onset sepsis.

101 *DNA extraction:* DNA was extracted using a fecal DNA extraction kit (ZR Fecal DNA MiniPrep™ Kit, Zymo  
102 Research Corp, Inc.). Stool samples were partially thawed and between 10mg and 100mg of stool was  
103 scooped using a pipette tip. The extraction protocol was carried out as specified by the kit, with the  
104 exception of the vortexing step, which was done using a standard bench top vortex for 5 minutes. DNA  
105 was eluted in elution buffer and stored at -20 °C.

106 *16S rRNA gene amplification and sequencing:* The V3 to V4 sequence of the 16SrRNA gene was amplified  
107 with two-stage PCR to first attach Illumina adapters and then attach sample specific barcodes. The first  
108 PCR to amplify the V3 to V4 region of the 16S rRNA gene used forward primer (5'-  
109 CCTACGGGNGGCWGCAG-3') and reverse primer (5'- GACTACHVGGGTATCTAATCC -3'). These primers  
110 also contained Illumina adapters. The first PCR was done as follows: 30 cycles of 95 °C 30 seconds; 65 °C  
111 40 seconds; 72 °C 1 minute. Immediately after completion of the first PCR, sample specific barcodes  
112 were added and a second PCR was performed as follows: 9 cycles 94 °C for 30 seconds; 55 °C 40  
113 seconds; 72 °C 1 minute. PCR reactions were cleaned using Agencourt AMPure XP magnetic beads  
114 (A63880) using the recommended protocol. Amplicons were run on an agarose gel to confirm  
115 amplification and then pooled roughly by brightness of band. Pooled amplicons were run on an agarose

116 gel and the 500bp fragment was cut out and gel extracted using Millipore Gel Extraction Kit  
117 (LSKGEL050). The pooled library was quantified using Quant-iT Pico Green dsDNA Reagent and sent to  
118 Laragen Inc. for sequencing on the Illumina MiSeq platform with 250bp paired-end reads. We obtained  
119 2.4 million paired-end reads.

120 *Sequence processing:* Sequences were quality filtered using PrinSeq to remove adapters as well as any  
121 sequences less than 200 base-pairs, containing any ambiguous bases, or with a mean PHRED quality  
122 score of less than 23. These parameters resulted in discarding about 10% of reads from each sample.  
123 Overlapping forward and reverse reads were joined with PEAR. The requirements for joining reads were  
124 a minimum overlap of 20 base pairs and no more than 25% were mismatched. These parameters  
125 resulted in an additional 10-30% of reads being discarded. After quality filtering and merging of reads,  
126 1.5 million reads remained. Quantitative Insights Into Microbial Ecology (QIIME) was used for closed  
127 reference OTUs picking at a 97% sequence similarity threshold with the UCLUST algorithm against the  
128 GreenGenes 13.5 database. An OTU table was constructed and used for downstream analysis. The OTU  
129 table was rarefied down to 2000 reads per sample, which was the largest number of reads that allowed  
130 us to keep most samples. The abundance counts were normalized by number of 16S copies in the  
131 genome of each species using PICRUSt.

132 *Metabolite processing:* When fecal samples were thawed for DNA extraction, approximately 50 mg was  
133 collected and refrozen at -80 ° for metabolomics. Samples were sent to the West Coast Metabolomics  
134 Center at UC Davis for untargeted metabolomics by gas chromatography time-of-flight mass  
135 spectrometry [26]. Metabolites were extracted from fecal samples with a 3:3:2 mixture of isopropanol,  
136 acetonitrile, and water respectively. Metabolite intensities were normalized by dividing each intensity  
137 by the average sum of all identified metabolites in all samples and multiplying by the sum of identified  
138 metabolites in the sample. Intensities were pareto scaled by metabolite.

139 *Sequencing analysis:* Bacterial composition plots based on the non-rarefied OTU tables were created  
140 using the ggplot2 package in R. The non-rarefied OTU table was used to make the composition plots  
141 since the samples were not being compared and rarefaction had little effect on the composition. QIIME  
142 was used to calculate Chao1 alpha diversity of each sample and UniFrac distances between each sample  
143 based on the rarefied OTU table. Unweighted UniFrac distances were visualized by PCoA using the vegan  
144 package for calculation and ggplot2 for visualization.

145 *Metabolomics ordination:* Bray-Curtis dissimilarity was calculated between each sample based on  
146 normalized, scaled metabolite intensities using the vegan package in R. Distances between samples  
147 were visualized by non-metric multidimensional scaling (NMDS).

148 *PERMANOVA:* Bacterial abundances and metabolite intensities were not normally distributed, so  
149 Permutational multivariate analysis of variance (PERMANOVA) was performed for statistical  
150 comparisons of samples. The inputs for PERMANOVA were UniFrac distances of the 16S data and Bray-  
151 Curtis distances of the metabolite abundances. Only infants with three or more longitudinal samples  
152 were included in PERMANOVAs. To determine if the bacterial composition of samples from infants with  
153 NEC were significantly different from samples from control or LOS infants, permutations assigned infants  
154 randomly to NEC or non-NEC, always assigning samples from an individual infant to the same group so  
155 that each permutation is equally biased by longitudinal sampling. To test if samples from an individual  
156 are personalized, every permutation randomly assigned samples to an individual with no restrictions.  
157 The adonis function in the vegan package in R was used to implement the PERMANOVAs.

158 *Mantel test:* To determine if fecal samples with similar bacterial compositions also have similar  
159 metabolite profiles, a mantel test was performed. To account for the effect of longitudinal sampling,  
160 each dataset was repeatedly subsampled down to one random sample per infant. A Bray-Curtis  
161 dissimilarity matrix was computed for both the metabolite abundances and bacterial abundances. The

162 mantel function in the vegan package of R was used to calculate the Mantel statistic for a Spearman  
163 correlation between the two dissimilarity matrices. Random selection of samples was repeated 100  
164 times and a Mantel test computed for each resampling.

165 *qPCR for bacterial load*: The bacterial load of each fecal sample was measured with quantitative PCR of a  
166 conserved region of the 16S gene. The following primers were used: (5'- TCC TAC GGG AGG CAG CAG T-  
167 3') ; (5'- GGA CTA CCA GGG TAT CTA ATC CTG TT-3'). PerfeCTa SYBER Green SuperMix Reaction Mix  
168 (Quantabio #95054) was used on extracted DNA samples. Relative abundance of 16S rRNA genes  
169 relative to the mass of stool was compared for each sample. Total fecal DNA was measured with Quant-  
170 iT Pico Green dsDNA Assay Kit (ThermoFisher #P11496).

171

## 172 **Results**

173 Patient cohort : A total of 77 fecal samples were collected from 32 ELBW infants in the NICU at  
174 Children's Hospital Orange County (**Supp. Table 1**). Three infants developed NEC, eight developed late-  
175 onset sepsis, and 21 remained healthy. Three or more longitudinal samples were available from ten of  
176 the infants, while one or two samples were available from the remaining 22 infants. Nearly all infants  
177 received antibiotics around the time of sample collection, the most common being ampicillin and  
178 gentamycin. Twelve infants were delivered vaginally while the remaining 22 were delivered by cesarean  
179 section. All infants were fed by either breastmilk or a combination of breastmilk and formula.

180 Microbial Community Characterization : We sequenced the 16S rRNA gene content of each fecal sample  
181 to determine bacterial composition. The total bacterial load of each fecal sample was measured by qPCR  
182 of the 16S rRNA gene and scaled to the total weight of stool that DNA was extracted from. Among all  
183 infants, bacterial abundances vary over four orders of magnitude (**Supp. Figure 2**). Bacterial  
184 communities were composed of mostly *Firmicutes* and *Proteobacteria* (**Supp. Figure 1**). Most samples



185 were dominated by only one to three genus of bacteria (**Figure 1, Supp. Figure 3**). The dominating taxa  
186 varied from infant to infant, but the most common were *Enterobacteriaceae*, *Enterococcus*, and  
187 *Staphylococcus*; all facultative anaerobes. The most common anaerobes detected were *Bacteroides* and  
188 *Viellonella*, although they were not present in all infants. Only three infants were colonized by  
189 *Bifidobacteria* with greater than 1% total relative abundance. Other typical anaerobic colonizers of  
190 infants seen in other infant studies such as *Clostridia*, and *Lactobacillus* were mostly absent. Longitudinal  
191 sampling revealed that over the course of days, the bacterial composition of these preterm infant's  
192 intestines could change dramatically, regardless of the overall health outcome of the infant.

193 The differences in overall bacteria composition of each sample were calculated by unweighted UniFrac  
194 distances and visualized by Principal Coordinates Analysis (PCoA) (**Figure 2**). Permutational Multivariate  
195 Analysis of Variance (PERMANOVA) shows that the bacterial composition of infants with NEC did not  
196 differ from that of healthy infants or infants that developed LOS ( $R^2 < 0.001$ ,  $p = 0.99$ ; **Table 1**). Alpha  
197 diversity as measured by Chao1 was not significantly different among sick and healthy infants ( $p =$   
198  $0.165$ ; **Supp. Figure 3**). While these infants' bacterial communities are prone to large-scale changes over  
199 time, they remain personalized. Samples taken from a single infant over time are more similar than  
200 samples taken from another infant ( $R^2 = 0.63$ ,  $p < .001$ ; **Table 1**).

201 Metabolomics : Metabolite profiles of infant fecal samples were also analyzed by gas chromatography  
202 mass spectrometry. Mainly small primary metabolites are detected by this method. Over 400 small  
203 molecules were detected from each fecal sample and 224 metabolites were confidently identified. Bray-  
204 Curtis dissimilarity between samples was computed and visualized by non-metric multidimensional  
205 scaling (NMDS)(**Figure 3**). PERMANOVA based on the dissimilarity matrix shows that the metabolite  
206 profiles of infants that develop NEC are not significantly different that other infants ( $R^2 = 0.05$ ,  $p = 0.24$ ;  
207 **Table 2**). Metabolite profiles were more variable over time in individual infants than bacterial  
208 abundances, but were still highly personalized ( $R^2 = 0.43$ ,  $p < 0.001$ ; **Table 2**).

209 Bacterial Composition is not correlated with metabolite profile : To test for a correlation between the  
210 measured bacteria composition and metabolite profile, we used a mantel test with Spearman  
211 correlations. The resulting Mantel statistic of  $r = 0.18$  ( $p < .001$ ) indicates that samples that are similar in  
212 bacterial composition are not also similar based on metabolite profiles. To ensure results are not biased  
213 by the particular random selection of infant samples, random selection and the Mantel test was  
214 repeated 100 times. The 95 % confidence interval for the 100 Mantel correlations is  $r = 0.17$  to  $0.19$ . This  
215 suggests the primary metabolite profile of fecal samples in preterm infants is not strongly driven by the  
216 bacterial composition.

217

## 218 **Discussion**

219 Microbiota compositions in this cohort are consistent with an emerging picture that show preterm  
220 infant intestines harbor unstable bacterial communities composed primarily of *Proteobacteria* and  
221 *Firmicutes* [12, 27, 28]. Even though the bacterial compositions of infant guts varied over time, we saw  
222 longitudinal samples from individual infants were significantly personalized over several weeks [29]. The  
223 gastrointestinal tract of infants is not yet anaerobic like that of adults, and *Bifidobacteria* are limited due  
224 to a combination of limited access, antibiotics and variable breastmilk consumption, so more aero-  
225 tolerant taxa such as *Enterobacteriaceae*, *Enterococcus*, and *Staphylococcus* dominated the infants in  
226 this study as well as similar studies of the infant microbiota [2, 12, 27, 28]. Evidence is emerging that a  
227 healthy infant gut microbiota is dominated by *Bifidobacteria* which are selected by their ability to digest  
228 human milk oligosaccharides in breastmilk [9, 10]. The lack of a core *Bifidobacteria* community leaves  
229 the microbiota open to colonization by facultative anaerobes [13].

230 Antibiotics impact the composition and abundances of the intestinal microbiota [30]. Even if microbiota  
231 composition in adults largely returns to its previous state one month after antibiotic treatment, altering

232 the microbiota composition of infants in a critically important developmental period can have long  
233 lasting health consequences [3, 30-32]. Preterm infants are commonly given antibiotics, and all infants in  
234 this study received antibiotics around sampling time [33]. Antibiotic exposure likely contributed to the  
235 low bacterial diversities and variable bacterial loads observed in this study. Infants in this study that  
236 developed NEC or late-onset sepsis did not have a different bacterial load than healthy controls.  
237 Although the healthy control preterm infants did not become sick during this study, their developing  
238 microbiota will be shaped by exposure to antibiotics which could have profound effects on immune  
239 development and growth [3, 32, 34].

240 We did not find healthy preterm infants to have a different microbial composition or metabolite  
241 composition than infants that develop late-onset sepsis or NEC. Instead, findings from this cohort agree  
242 with the idea that initial colonizing bacteria of the preterm infant gut are largely unique to the individual  
243 [35]. Most of these initial colonizers are not species seen in adult microbiota, but the timing and  
244 composition of the early colonizers may have an effect on immune development that is independent of  
245 the stable, adult-like composition that emerges around age three [36]. Several studies have  
246 demonstrated a correlative relationship between strains of bacteria and NEC, but none have  
247 demonstrated a causative relationship [37-39]. Interactions between intestinal bacteria and the immune  
248 system are likely to be involved in pathogenesis, but the specific triggers are still unknown [15, 16, 40].

249 The metabolite profiles of fecal samples in this study were found to be highly personalized. Many factors  
250 influence the abundances of metabolites in fecal samples including: bacterial compositions, bacterial  
251 activity, host biology, and feeding. Among infants in this cohort, the global metabolite profile was not  
252 correlated with the composition of bacteria. However, bacteria have been shown to be important  
253 contributors to the fecal metabolome [41-43]. The primary metabolites measured by GC-MS in this  
254 study may be more difficult to correlate with specific microbe activity during antibiotic treatment than  
255 other forms of metabolite profiling, such as LC-MS targeting larger immune lipids. Metabolic signatures

256 of disease have great promise to complement microbiota profiling in human systems [13, 28]. However,  
257 the transient and low abundance microbial populations in preterm infants may have a lesser effect on  
258 the fecal metabolome than established microbial communities.

259

#### 260 **Availability of data and materials**

261 The sequence data supporting the conclusions of this article are in the process of being posted to SRA  
262 and will be made available upon publication.

263

#### 264 **References**

- 265 1. Nayfach S, Rodriguez-Mueller B, Garud N, Pollard KS: **An integrated metagenomics pipeline for**  
266 **strain profiling reveals novel patterns of bacterial transmission and biogeography.** *Genome*  
267 *Res* 2016, **26**:1612-1625.
- 268 2. Bezirtzoglou E: **The Intestinal Microflora During the First Weeks of Life.** *Anaerobe* 1997, **3**:173-  
269 177.
- 270 3. Cox Laura M, Yamanishi S, Sohn J, Alekseyenko Alexander V, Leung Jacqueline M, Cho I, Kim  
271 Sungheon G, Li H, Gao Z, Mahana D, et al: **Altering the Intestinal Microbiota during a Critical**  
272 **Developmental Window Has Lasting Metabolic Consequences.** *Cell* 2014, **158**:705-721.
- 273 4. Nobel YR, Cox LM, Kirigin FF, Bokulich NA, Yamanishi S, Teitler I, Chung J, Sohn J, Barber CM,  
274 Goldfarb DS, et al: **Metabolic and metagenomic outcomes from early-life pulsed antibiotic**  
275 **treatment.** *Nature Communications* 2015, **6**:7486.
- 276 5. Tanaka S, Kobayashi T, Songjinda P, Tateyama A, Tsubouchi M, Kiyohara C, Shirakawa T,  
277 Sonomoto K, Nakayama J: **Influence of antibiotic exposure in the early postnatal period on the**

- 278            **development of intestinal microbiota.** *FEMS immunology and medical microbiology* 2009,  
279            **56:80-87.**
- 280    6.        Keski-Nisula L, Kynnäräinen H-R, Kärkkäinen U, Karhukorpi J, Heinonen S, Pekkanen J: **Maternal**  
281            **intrapartum antibiotics and decreased vertical transmission of *Lactobacillus* to neonates**  
282            **during birth.** *Acta Paediatrica (Oslo, Norway: 1992)* 2013, **102:480-485.**
- 283    7.        Ting JY, Synnes A, Roberts A, Deshpandey A, Dow K, Yoon EW, Lee K-S, Dobson S, Lee SK, Shah  
284            **PS: Association Between Antibiotic Use and Neonatal Mortality and Morbidities in Very Low-**  
285            **Birth-Weight Infants Without Culture-Proven Sepsis or Necrotizing Enterocolitis.** *JAMA*  
286            *Pediatrics* 2016, **170:1181-1187.**
- 287    8.        Stokholm J, Schjørring S, Pedersen L, Bischoff AL, Følsgaard N, Carson CG, Chawes BLK,  
288            Bønnelykke K, Mølgaard A, Krogfelt KA, Bisgaard H: **Prevalence and predictors of antibiotic**  
289            **administration during pregnancy and birth.** *PloS One* 2013, **8:e82932.**
- 290    9.        German JB, Freeman SL, Lebrilla CB, Mills DA: **Human milk oligosaccharides: evolution,**  
291            **structures and bioselectivity as substrates for intestinal bacteria.** *Nestle Nutrition Workshop*  
292            *Series Paediatric Programme* 2008, **62:205-218; discussion 218-222.**
- 293    10.       Lewis ZT, Mills DA: **Differential Establishment of Bifidobacteria in the Breastfed Infant Gut.**  
294            2017, **88:149-159.**
- 295    11.       Korpela K, Salonen A, Virta LJ, Kekkonen RA, de Vos WM: **Association of Early-Life Antibiotic**  
296            **Use and Protective Effects of Breastfeeding: Role of the Intestinal Microbiota.** *JAMA Pediatr*  
297            2016, **170:750-757.**
- 298    12.       Rosa PSL, Warner BB, Zhou Y, Weinstock GM, Sodergren E, Hall-Moore CM, Stevens HJ, Bennett  
299            WE, Shaikh N, Linneman LA, et al: **Patterned progression of bacterial populations in the**  
300            **premature infant gut.** *Proceedings of the National Academy of Sciences* 2014, **111:12522-12527.**

- 301 13. Stewart CJ, Embleton ND, Marrs ECL, Smith DP, Nelson A, Abdulkadir B, Skeath T, Petrosino JF,  
302 Perry JD, Berrington JE, Cummings SP: **Temporal bacterial and metabolic development of the**  
303 **preterm gut reveals specific signatures in health and disease.** *Microbiome* 2016, **4**.
- 304 14. Fitzgibbons SC, Ching Y, Yu D, Carpenter J, Kenny M, Weldon C, Lillehei C, Valim C, Horbar JD,  
305 Jaksic T: **Mortality of necrotizing enterocolitis expressed by birth weight categories.** *Journal of*  
306 *Pediatric Surgery* 2009, **44**:1072-1075; discussion 1075-1076.
- 307 15. Nanthakumar N, Meng D, Goldstein AM, Zhu W, Lu L, Uauy R, Llanos A, Claud EC, Walker WA:  
308 **The mechanism of excessive intestinal inflammation in necrotizing enterocolitis: an immature**  
309 **innate immune response.** *PloS One* 2011, **6**:e17776.
- 310 16. Wu H-J, Wu E: **The role of gut microbiota in immune homeostasis and autoimmunity.** *Gut*  
311 *Microbes* 2012, **3**:4-14.
- 312 17. Ley RE, Bäckhed F, Turnbaugh P, Lozupone CA, Knight RD, Gordon JI: **Obesity alters gut**  
313 **microbial ecology.** *Proceedings of the National Academy of Sciences of the United States of*  
314 *America* 2005, **102**:11070-11075.
- 315 18. Turnbaugh PJ, Ley RE, Mahowald MA, Magrini V, Mardis ER, Gordon JI: **An obesity-associated**  
316 **gut microbiome with increased capacity for energy harvest.** *Nature* 2006, **444**:1027-1131.
- 317 19. Larsen N, Vogensen FK, Berg FWJvd, Nielsen DS, Andreasen AS, Pedersen BK, Al-Soud WA,  
318 Sørensen SJ, Hansen LH, Jakobsen M: **Gut Microbiota in Human Adults with Type 2 Diabetes**  
319 **Differs from Non-Diabetic Adults.** *PLOS ONE* 2010, **5**:e9085.
- 320 20. Suskind DL, Brittnacher MJ, Wahbeh G, Shaffer ML, Hayden HS, Qin X, Singh N, Damman CJ,  
321 Hager KR, Nielson H, Miller SI: **Fecal microbial transplant effect on clinical outcomes and fecal**  
322 **microbiome in active Crohn's disease.** *Inflamm Bowel Dis* 2015, **21**:556-563.

- 323 21. Berer K, Mues M, Koutrolas M, Rasbi ZA, Boziki M, Johner C, Wekerle H, Krishnamoorthy G:  
324 **Commensal microbiota and myelin autoantigen cooperate to trigger autoimmune**  
325 **demyelination.** *Nature* 2011, **479**:538-541.
- 326 22. Willemsen LEM, Koetsier MA, van Deventer SJH, van Tol EAF: **Short chain fatty acids stimulate**  
327 **epithelial mucin 2 expression through differential effects on prostaglandin E1 and E2**  
328 **production by intestinal myofibroblasts.** *Gut* 2003, **52**:1442-1447.
- 329 23. Cummings Jh, Macfarlane Gt: **The control and consequences of bacterial fermentation in the**  
330 **human colon.** *Journal of Applied Bacteriology* 1991, **70**:443-459.
- 331 24. Kelly CJ, Zheng L, Campbell EL, Saeedi B, Scholz CC, Bayless AJ, Wilson KE, Glover LE, Kominsky  
332 DJ, Magnuson A, et al: **Crosstalk between Microbiota-Derived Short-Chain Fatty Acids and**  
333 **Intestinal Epithelial HIF Augments Tissue Barrier Function.** *Cell Host & Microbe* 2015, **17**:662-  
334 671.
- 335 25. Chang PV, Hao L, Offermanns S, Medzhitov R: **The microbial metabolite butyrate regulates**  
336 **intestinal macrophage function via histone deacetylase inhibition.** *Proceedings of the National*  
337 *Academy of Sciences* 2014, **111**:2247-2252.
- 338 26. Fiehn O, West Coast Metabolomics Center UoCDGCDC, King Abdulaziz University BDJSA, Fiehn  
339 O: **Metabolomics by Gas Chromatography–Mass Spectrometry: Combined Targeted and**  
340 **Untargeted Profiling.** 2017:30.34.31-30.34.32.
- 341 27. Gibson MK, Wang B, Ahmadi S, Burnham C-AD, Tarr PI, Warner BB, Dantas G: **Developmental**  
342 **dynamics of the preterm infant gut microbiota and antibiotic resistome.** *Nature microbiology*  
343 2016, **1**:16024.
- 344 28. Raveh-Sadka T, Thomas BC, Singh A, Firek B, Brooks B, Castelle CJ, Sharon I, Baker R, Good M,  
345 Morowitz MJ, Banfield JF: **Gut bacteria are rarely shared by co-hospitalized premature infants,**  
346 **regardless of necrotizing enterocolitis development.** *eLife* 2015, **4**.

- 347 29. Faith JJ, Guruge JL, Charbonneau M, Subramanian S, Seedorf H, Goodman AL, Clemente JC,  
348 Knight R, Heath AC, Leibel RL, et al: **The Long-Term Stability of the Human Gut Microbiota.**  
349 2013.
- 350 30. Dethlefsen L, Huse S, Sogin ML, Relman DA: **The Pervasive Effects of an Antibiotic on the**  
351 **Human Gut Microbiota, as Revealed by Deep 16S rRNA Sequencing.** *PLOS Biology* 2008,  
352 6:e280.
- 353 31. Dethlefsen L, Relman DA: **Incomplete recovery and individualized responses of the human**  
354 **distal gut microbiota to repeated antibiotic perturbation.** *Proceedings of the National Academy*  
355 *of Sciences of the United States of America* 2011, **108 Suppl 1**:4554-4561.
- 356 32. Schulfer A, Blaser MJ: **Risks of Antibiotic Exposures Early in Life on the Developing Microbiome.**  
357 *PLOS Pathogens* 2015, **11**:e1004903.
- 358 33. Clark RH, Bloom BT, Spitzer AR, Gerstmann DR: **Reported Medication Use in the Neonatal**  
359 **Intensive Care Unit: Data From a Large National Data Set.** *Pediatrics* 2006, **117**:1979-1987.
- 360 34. Rautava S, Luoto R, Salminen S, Isolauri E: **Microbial contact during pregnancy, intestinal**  
361 **colonization and human disease.** *Nature Reviews Gastroenterology and Hepatology* 2012,  
362 9:565-576.
- 363 35. Raveh-Sadka T, Firek B, Sharon I, Baker R, Brown CT, Thomas BC, Morowitz MJ, Banfield JF:  
364 **Evidence for persistent and shared bacterial strains against a background of largely unique gut**  
365 **colonization in hospitalized premature infants.** *The ISME Journal* 2016.
- 366 36. Yatsunenko T, Rey FE, Manary MJ, Trehan I, Dominguez-Bello MG, Contreras M, Magris M,  
367 Hidalgo G, Baldassano RN, Anokhin AP, et al: **Human gut microbiome viewed across age and**  
368 **geography.** *Nature* 2012, **486**:222-227.



- 369 37. Ward DV, Scholz M, Zolfo M, Taft DH, Schibler KR, Tett A, Segata N, Morrow AL: **Metagenomic**  
370 **Sequencing with Strain-Level Resolution Implicates Uropathogenic E. coli in Necrotizing**  
371 **Enterocolitis and Mortality in Preterm Infants.** *Cell Reports* 2016, **14**:2912-2924.
- 372 38. Sim K, Shaw AG, Randell P, Cox MJ, McClure ZE, Li M-S, Haddad M, Langford PR, Cookson  
373 WOCM, Moffatt MF, Kroll JS: **Dysbiosis Anticipating Necrotizing Enterocolitis in Very Premature**  
374 **Infants.** *Clinical Infectious Diseases* 2015, **60**:389-397.
- 375 39. McMurtry VE, Gupta RW, Tran L, Blanchard EE, Penn D, Taylor CM, Ferris MJ: **Bacterial diversity**  
376 **and Clostridia abundance decrease with increasing severity of necrotizing enterocolitis.**  
377 *Microbiome* 2015, **3**.
- 378 40. Nanthakumar NN, Fusunyan RD, Sanderson I, Walker WA: **Inflammation in the developing**  
379 **human intestine: A possible pathophysiologic contribution to necrotizing enterocolitis.**  
380 *Proceedings of the National Academy of Sciences of the United States of America* 2000, **97**:6043-  
381 6048.
- 382 41. Zheng X, Xie G, Zhao A, Zhao L, Yao C, Chiu NHL, Zhou Z, Bao Y, Jia W, Nicholson JK, Jia W: **The**  
383 **Footprints of Gut Microbial–Mammalian Co-Metabolism.** *Journal of Proteome Research* 2011,  
384 **10**:5512-5522.
- 385 42. Yen S, McDonald JAK, Schroeter K, Oliphant K, Sokolenko S, Blondeel EJM, Allen-Vercoe E,  
386 Aucoin MG: **Metabolomic Analysis of Human Fecal Microbiota: A Comparison of Feces-Derived**  
387 **Communities and Defined Mixed Communities.** *Journal of Proteome Research* 2015, **14**:1472-  
388 1482.
- 389 43. Martin F-PJ, Dumas M-E, Wang Y, Legido-Quigley C, Yap IKS, Tang H, Zirah S, Murphy GM,  
390 Cloarec O, Lindon JC, et al: **A top-down systems biology view of microbiome-mammalian**  
391 **metabolic interactions in a mouse model.** *Molecular Systems Biology* 2007, **3**.

392

393

394 **Funding**

395 This project was supported by a UCI Single Investigator grant, the CORCCL SIIG-2014-2015-51, a pilot  
396 grant from the UC Davis West Coast Metabolomics Core as part of NIH-DK097154, and start-up funds for  
397 the Whiteson Lab in UC Irvine's Molecular Biology and Biochemistry Department.

398

399 **Acknowledgements**

400 We would like to acknowledge the contributions of Celine Mougnot, who shared protocols and primers,  
401 and Ying (Lucy) Lu, who conducted some of the qPCR measurements and generally helped with the  
402 sample preparation for 16S rRNA gene sequencing. Megan Showalter and Prof. Oliver Fiehn of the UC  
403 Davis West Coast Metabolomics Core were very helpful in carrying out untargeted GC-MS profiling.  
404 Thank you to those that discussed this project with me including Prof. Jen Martiny and Prof. Naomi  
405 Morrissette.

406

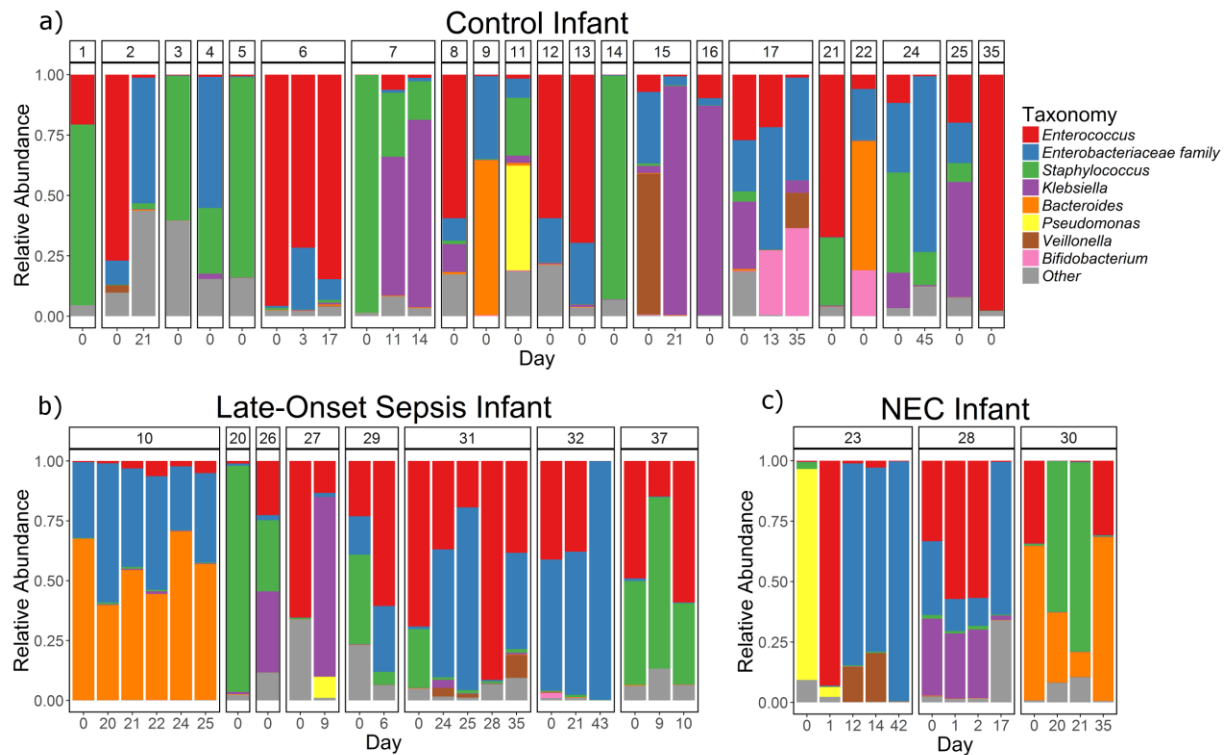

407

408 **Figure 1. The relative bacterial community composition of fecal samples level.** Relative bacterial  
 409 composition based on sequencing the V3-V4 region of the 16S rRNA gene. Infants are grouped by health  
 410 outcome as a) control, b) LOS, or c) NEC. Numbers at the top indicate identify individual infants. Days  
 411 are relative to the first sample from each infant, indicated as day 0. For cases in which multiple samples  
 412 were taken from one infant on the same day, only one is shown.

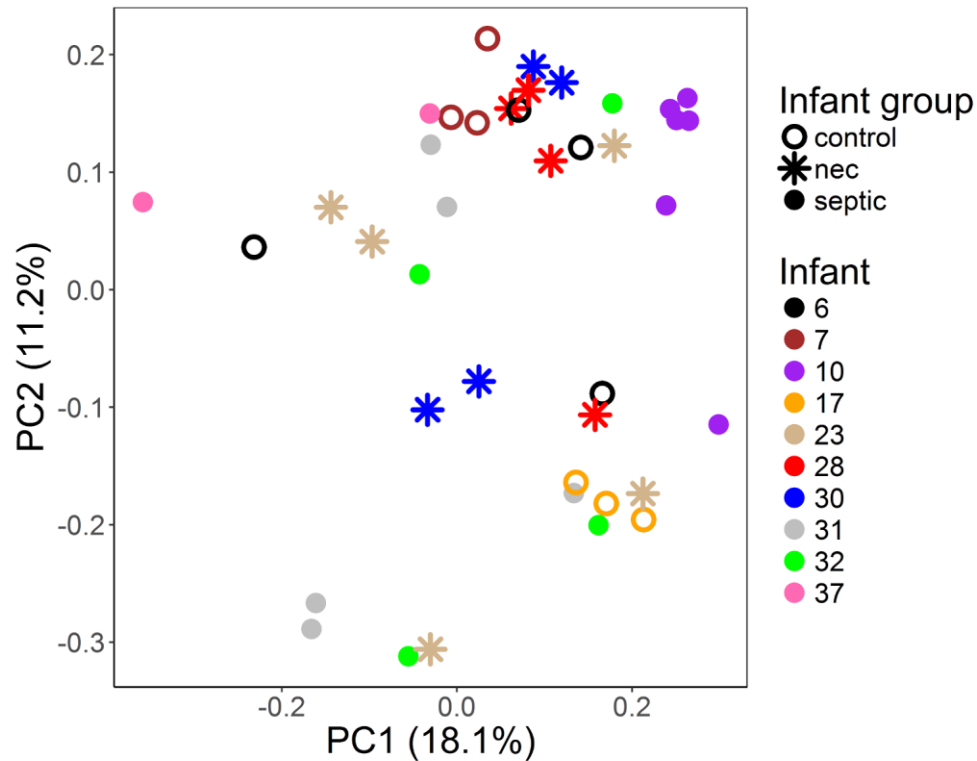

413

414 **Figure 2. Unweighted UniFrac distances between fecal bacterial communities were visualized by**  
415 **Principal coordinates analysis (PCoA).** Points are colored by infant from which the sample fecal sample  
416 originated. The shape of each point indicates the infant health outcome. The first two principal  
417 coordinates are plotted, which account for 17.9 % and 11.1 % of observed variation. Only samples in  
418 which three longitudinal samples were available are shown.

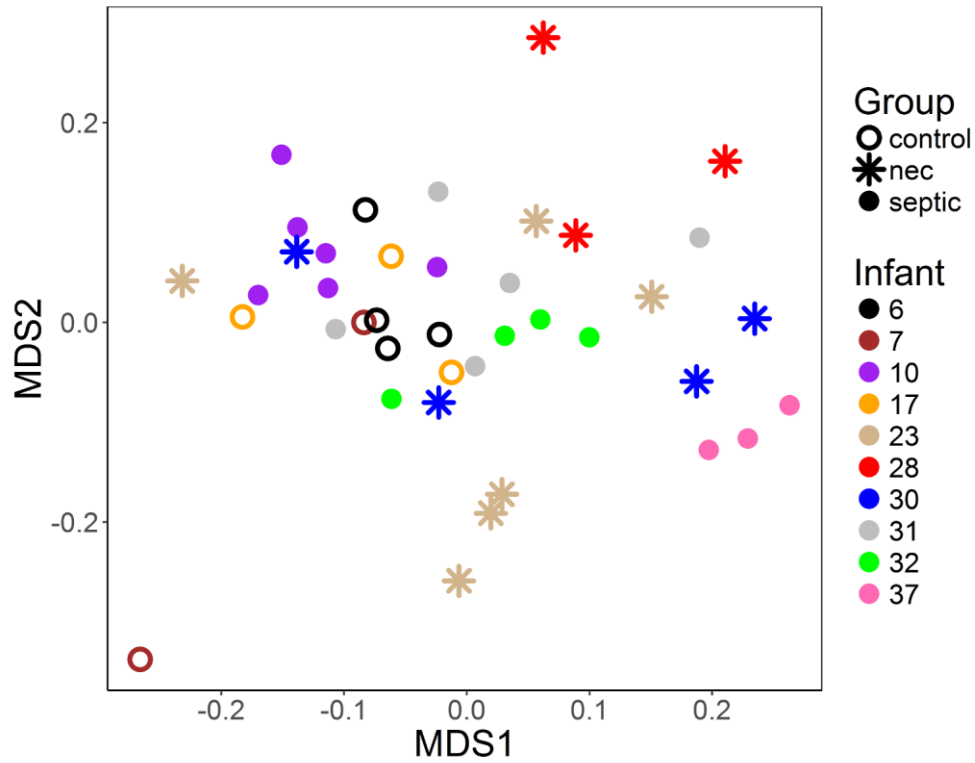

419

420 **Fig. 3 Non-metric multidimensional scaling of Bray Curtis distances between fecal sample based on**  
421 **metabolite abundances.** Distances calculated on metabolite abundances that were normalized by  
422 sample and pareto scaled by metabolite. The stress associated with this ordination is 0.166. Points are  
423 colored by infant from which the sample fecal sample originated. The shape of each point indicates the  
424 infant health outcome. Only samples in which three longitudinal samples were available are shown.

|            | <b>Df</b> | <b>Pseudo-F</b> | <b>Variance explained (R<sup>2</sup>)</b> | <b>P-value</b> |
|------------|-----------|-----------------|-------------------------------------------|----------------|
| Health     | 1         | 0.03            | 0.001                                     | 0.99           |
| Individual | 9         | 3.22            | 0.62                                      | < 0.001        |
| Residuals  | 38        |                 | 0.378                                     |                |
| Total      | 40        |                 | 1.000                                     |                |

425 **Table 1. PERMANOVA based on unweighted UniFrac distances.** PERMANOVA indicates that bacterial  
426 compositions of fecal samples are personalized to the individual. Fecal samples from infants with NEC  
427 were not different from other infants based on bacterial compositions. Samples were permuted across  
428 health status (NEC versus control or LOS) or by individual (which infant the sample came from). In the  
429 case of health status, permutations were restricted so samples from a single infant were always  
430 assigned the same group to disentangle the effects from the origin of sample. Only samples with three  
431 or more longitudinal samples were included in analysis.

|            | <b>Df</b> | <b>Pseudo-F</b> | <b>Variance explained (R<sup>2</sup>)</b> | <b>P-value</b> |
|------------|-----------|-----------------|-------------------------------------------|----------------|
| Health     | 1         | 2.6             | 0.05                                      | 0.24           |
| Individual | 9         | 2.57            | 0.43                                      | < 0.001        |
| Residuals  | 39        |                 | 0.52                                      |                |
| Total      | 40        |                 | 1.000                                     |                |

432 **Table 2. PERMANOVA based on Bray-Curtis dissimilarity of metabolite profiles among samples.**

433 PERMANOVA indicates that metabolomic profiles of fecal samples are personalized to the individual.

434 Fecal samples from infants with NEC were not different from other infants based on global

435 metabolomics profile. Samples were permuted across health status (NEC versus control or LOS) or by

436 individual (which infant the sample came from). In the case of health status, permutations were

437 restricted so samples from a single infant were always assigned the same group to disentangle the

438 effects from the origin of sample. Only samples with three or more longitudinal samples were included

439 in analysis.
